# Supplementary material for: Free energy cost to assemble superlattices of polymer-grafted nanoparticles
Source: Royal Society of Chemistry journal article supplement (doi:10.1039/d1sm01491a), 2021-12-06
Supplement: d1sm01491a1.pdf [file d1sm01491a1.pdf]

## Supplementary Information for Free Energy Cost to Assemble Superlattices of Polymer-Grafted Nanoparticles

Dingning Li<sup>1</sup> and Kai Zhang<sup>1,2,\*</sup>

<sup>1</sup>Division of Natural and Applied Sciences, Duke Kunshan University, Kunshan, Jiangsu, 215300, China

<sup>2</sup>Data Science Research Center (DSRC), Duke Kunshan University, Kunshan, Jiangsu, 215300, China

### 1. WALL POTENTIAL

The confining walls interact with each monomer with a repulsive harmonic potential

$$u_w(r) = \begin{cases} 0, & r < 0 \\ \kappa\epsilon(r/\sigma)^2, & 0 \leq r \leq \delta \\ \infty, & r > \delta \end{cases} \quad (1)$$

where  $r$  is the distance of the monomer from the surface of a wall ( $x_s$  in Fig. S1) and  $\delta$  is the thickness or maximum penetration depth into the wall. Repulsion strength is empirically set as  $\kappa = 80$ . The overall interaction energy  $W$  between  $N$  monomers and  $Z$  walls is  $W = \sum_{i=1}^N \sum_{j=1}^Z u_w(r_{ij})$ .

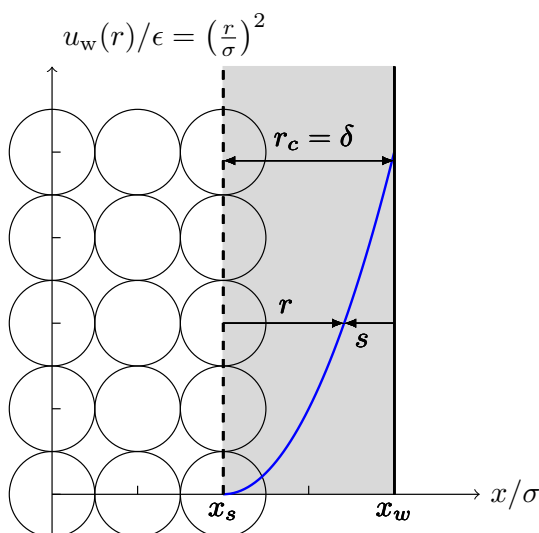

FIG. S1: Wall potential energy and its notation defined in LAMMPS.

The implementation of  $u_w(r)$  in LAMMPS [1] follows a different definition

$$E = \begin{cases} \epsilon(s - r_c)^2, & s < r_c \\ 0, & s \geq r_c \end{cases} \quad (2)$$

where  $\epsilon$  is set to 80 as  $\kappa$  above. The cutoff  $r_c$  is the effective thickness  $\delta$  of the wall and  $s$  is the distance from the effective location of the wall ( $x_w$  in Fig. S1).

\*Electronic address: kai.zhang@dukekunshan.edu.cn

## 2. GEOMETRY OF WIGNER-SEITZ POLYHEDRA

TABLE S1: The four types of Wigner-Seitz polyhedra, whose surface area  $A$  is expressed in terms of volume  $V$ . Number of faces  $z$  and the corresponding normal vector  $\hat{\mathbf{n}}$  are also listed [2, 3]. Confining walls are placed according to normal vectors  $\hat{\mathbf{n}}$ 's.

| polyhedron                                                                                                | $A$                                                                                                  | $z$ | $\hat{\mathbf{n}}$                                                                |
|-----------------------------------------------------------------------------------------------------------|------------------------------------------------------------------------------------------------------|-----|-----------------------------------------------------------------------------------|
| truncated octahedron                                                                                      | $\frac{3+6\sqrt{3}}{2^{3/2}}V^{2/3} \approx 5.31V^{2/3}$                                             | 6   | $(\pm 1, 0, 0), (0, \pm 1, 0), (0, 0, \pm 1)$                                     |
| <br>rhombic dodecahedron | $\frac{6}{\sqrt{2}}V^{2/3} \approx 5.35V^{2/3}$                                                      | 8   | $(\pm 1, \pm 1, \pm 1)$                                                           |
| <br>tetrakaidcahedron    | $\left[2 + 2\sqrt{6} - \left(\frac{2\sqrt{6}}{3} + \frac{1-\sqrt{5}}{2}\right)2^{2/3}\right]V^{2/3}$ | 4   | $(\pm 1, \pm 1, \pm \sqrt{2})$<br>$(1, 0, \pm 2), (-1, \pm 2, 0)$                 |
|  Z14                     | $\approx 5.29V^{2/3}$                                                                                | 8   | $(-1, \pm 1, \pm 2), (1, \pm 2, \pm 1)$                                           |
|  Z12                     | $\frac{3\sqrt{5}}{2}2^{2/3}V^{2/3} \approx 5.32V^{2/3}$                                              | 12  | $(\pm 1, 0, 0)$<br>$(0, \pm 1, \pm 2), (\pm 1, 0, \pm 2),$<br>$(\pm 1, \pm 2, 0)$ |

## 3. SUMMARY OF FREE ENERGY RESULTS

$a$  is the lattice constant along the nearest neighbor direction.  $\bar{\rho} = \frac{N_p N_c}{[V - \frac{4\pi}{3}(5\sigma)^3]}$  is monomer number density in bulk.

TABLE S2: FENE bond only.  $N_p = 20$ ,  $V_0 = 13727.6$ ,  $R_0 = 14.85$ .

| $V/V_0$ $\bar{\rho}$ | BCC   |        |        |        | FCC   |        |        |        | A15    |        |        |
|----------------------|-------|--------|--------|--------|-------|--------|--------|--------|--------|--------|--------|
|                      | $a$   | $F_V$  | $F_S$  | $F$    | $a$   | $F_V$  | $F_S$  | $F$    | $F_V$  | $F_S$  | $F$    |
| 0.546 0.573          | 21.36 | 2836.1 | -911.2 | 1924.9 | 21.97 | 2844.7 | -914.7 | 1930.0 | 2840.0 | -918.0 | 1922.1 |
| 0.583 0.535          | 21.82 | 2334.7 | -807.9 | 1526.8 | 22.45 | 2342.1 | -811.0 | 1531.1 | 2339.4 | -812.1 | 1527.3 |
| 0.626 0.495          | 22.35 | 1876.9 | -704.6 | 1172.4 | 23.00 | 1883.8 | -706.7 | 1177.1 | 1882.6 | -708.1 | 1174.4 |
| 0.670 0.461          | 22.86 | 1529.8 | -618.1 | 911.7  | 23.52 | 1536.3 | -619.8 | 916.5  | 1535.6 | -621.0 | 914.6  |
| 0.728 0.422          | 23.51 | 1183.9 | -522.7 | 661.2  | 24.18 | 1190.7 | -523.5 | 667.2  | 1190.9 | -525.0 | 665.9  |
| 0.787 0.389          | 24.12 | 931.5  | -444.1 | 487.4  | 24.81 | 936.9  | -444.3 | 492.5  | 938.1  | -445.9 | 492.2  |

TABLE S3: FENE bond and bond angle.  $N_p = 20$ ,  $V_0 = 13290.8$ ,  $R_0 = 14.69$ .

| $V/V_0$ $\bar{\rho}$ | BCC   |        |        |        | FCC   |        |        |        |
|----------------------|-------|--------|--------|--------|-------|--------|--------|--------|
|                      | $a$   | $F_V$  | $F_S$  | $F$    | $a$   | $F_V$  | $F_S$  | $F$    |
| 0.5643 0.573         | 21.36 | 2956.5 | -961.4 | 1995.1 | 21.97 | 2965.1 | -966.1 | 1999.1 |
| 0.602 0.535          | 21.82 | 2411.3 | -846.5 | 1564.8 | 22.45 | 2420.0 | -849.4 | 1570.6 |
| 0.647 0.495          | 22.35 | 1914.6 | -730.7 | 1183.9 | 23.00 | 1923.1 | -733.3 | 1189.8 |
| 0.692 0.461          | 22.86 | 1543.0 | -635.2 | 907.8  | 23.52 | 1550.4 | -636.2 | 914.2  |
| 0.737 0.431          | 23.35 | 1257.4 | -554.2 | 703.2  | 24.02 | 1264.4 | -554.8 | 709.5  |
| 0.798 0.397          | 23.97 | 969.9  | -463.8 | 506.1  | 24.66 | 976.6  | -463.9 | 512.7  |

TABLE S4: FENE bond only.  $N_p = 40$ ,  $V_0 = 40556.9$ ,  $R_0 = 21.32$ .

|         |              | BCC   |        |         |        | FCC   |        |         |        |
|---------|--------------|-------|--------|---------|--------|-------|--------|---------|--------|
| $V/V_0$ | $\bar{\rho}$ | $a$   | $F_V$  | $F_S$   | $F$    | $a$   | $F_V$  | $F_S$   | $F$    |
| 0.395   | 0.517        | 27.49 | 4725.3 | -1244.5 | 3480.8 | 28.28 | 4732.9 | -1254.1 | 3478.8 |
| 0.444   | 0.458        | 28.60 | 3493.6 | -1034.7 | 2458.9 | 29.42 | 3502.0 | -1042.1 | 2459.8 |
| 0.518   | 0.391        | 30.10 | 2358.6 | -812.2  | 1546.4 | 30.97 | 2365.4 | -816.9  | 1548.5 |
| 0.616   | 0.327        | 31.90 | 1505.0 | -611.3  | 893.7  | 32.82 | 1510.0 | -614.1  | 895.9  |
| 0.715   | 0.281        | 33.52 | 1014.5 | -472.5  | 542.0  | 34.49 | 1019.0 | -473.8  | 545.3  |
| 0.838   | 0.239        | 35.35 | 652.2  | -348.3  | 304.0  | 36.36 | 656.0  | -348.9  | 307.1  |

TABLE S5: FENE bond and bond angle.  $N_p = 40$ ,  $V_0 = 39874.5$ ,  $R_0 = 21.19$ .

|         |              | BCC   |        |         |        | FCC   |        |         |        |
|---------|--------------|-------|--------|---------|--------|-------|--------|---------|--------|
| $V/V_0$ | $\bar{\rho}$ | $a$   | $F_V$  | $F_S$   | $F$    | $a$   | $F_V$  | $F_S$   | $F$    |
| 0.401   | 0.517        | 27.49 | 5093.0 | -1331.4 | 3761.6 | 28.28 | 5099.9 | -1338.9 | 3761.0 |
| 0.451   | 0.458        | 28.60 | 3717.2 | -1094.6 | 2622.6 | 29.42 | 3724.8 | -1101.2 | 2623.5 |
| 0.502   | 0.411        | 29.62 | 2807.4 | -918.4  | 1889.0 | 30.47 | 2815.1 | -924.0  | 1891.1 |
| 0.577   | 0.356        | 31.03 | 1932.0 | -725.3  | 1206.7 | 31.92 | 1938.8 | -729.4  | 1209.5 |
| 0.677   | 0.302        | 32.73 | 1248.1 | -546.6  | 701.4  | 33.67 | 1254.1 | -548.4  | 705.8  |
| 0.803   | 0.254        | 34.64 | 771.5  | -394.2  | 377.4  | 35.64 | 776.6  | -394.8  | 381.8  |

TABLE S6: FENE bond only.  $N_p = 60$ ,  $V_0 = 78836.1$ ,  $R_0 = 26.60$ .

|         |              | BCC   |        |         |        | FCC   |        |         |        |
|---------|--------------|-------|--------|---------|--------|-------|--------|---------|--------|
| $V/V_0$ | $\bar{\rho}$ | $a$   | $F_V$  | $F_S$   | $F$    | $a$   | $F_V$  | $F_S$   | $F$    |
| 0.304   | 0.511        | 31.47 | 7216.6 | -1618.3 | 5598.3 | 32.38 | 7226.4 | -1630.7 | 5595.6 |
| 0.342   | 0.453        | 32.73 | 5446.0 | -1362.0 | 4084.1 | 33.67 | 5455.0 | -1373.4 | 4081.6 |
| 0.393   | 0.394        | 34.28 | 3931.9 | -1116.2 | 2815.7 | 35.26 | 3941.0 | -1124.4 | 2816.6 |
| 0.444   | 0.348        | 35.69 | 2960.6 | -936.8  | 2023.7 | 36.72 | 2968.4 | -943.6  | 2024.8 |
| 0.507   | 0.304        | 37.32 | 2163.2 | -770.3  | 1392.9 | 38.39 | 2168.0 | -776.2  | 1391.8 |
| 0.571   | 0.270        | 38.81 | 1632.9 | -645.4  | 987.5  | 39.92 | 1638.5 | -648.9  | 989.7  |
| 0.634   | 0.243        | 40.20 | 1263.4 | -547.5  | 715.9  | 41.35 | 1267.8 | -549.3  | 718.5  |
| 0.710   | 0.216        | 41.74 | 951.3  | -453.8  | 497.4  | 42.94 | 955.4  | -455.2  | 500.1  |

TABLE S7: FENE bond and bond angle.  $N_p = 60$ ,  $V_0 = 78047.2$ ,  $R_0 = 26.51$ .

|         |              | BCC   |        |         |        | FCC   |        |         |        |
|---------|--------------|-------|--------|---------|--------|-------|--------|---------|--------|
| $V/V_0$ | $\bar{\rho}$ | $a$   | $F_V$  | $F_S$   | $F$    | $a$   | $F_V$  | $F_S$   | $F$    |
| 0.308   | 0.511        | 31.47 | 7875.1 | -1740.8 | 6134.4 | 32.38 | 7883.6 | -1753.8 | 6129.8 |
| 0.346   | 0.453        | 32.73 | 5873.0 | -1449.9 | 4423.1 | 33.67 | 5883.6 | -1461.1 | 4422.5 |
| 0.384   | 0.407        | 33.90 | 4531.5 | -1233.4 | 3298.0 | 34.88 | 4542.1 | -1243.7 | 3298.4 |
| 0.436   | 0.358        | 35.35 | 3340.4 | -1020.8 | 2319.6 | 36.36 | 3349.1 | -1027.3 | 2321.9 |
| 0.487   | 0.320        | 36.68 | 2547.3 | -860.9  | 1686.4 | 37.74 | 2554.5 | -867.0  | 1687.5 |
| 0.551   | 0.283        | 38.23 | 1880.7 | -710.9  | 1169.9 | 39.32 | 1885.8 | -714.9  | 1170.9 |
| 0.615   | 0.253        | 39.65 | 1428.7 | -596.2  | 832.5  | 40.79 | 1433.9 | -598.6  | 835.3  |
| 0.679   | 0.229        | 40.99 | 1109.9 | -504.8  | 605.1  | 42.16 | 1114.2 | -507.3  | 606.9  |

#### 4. DISTRIBUTION OF GRAFTED POLYMERS FOR $N_p = 40$ AT $V = 34000$

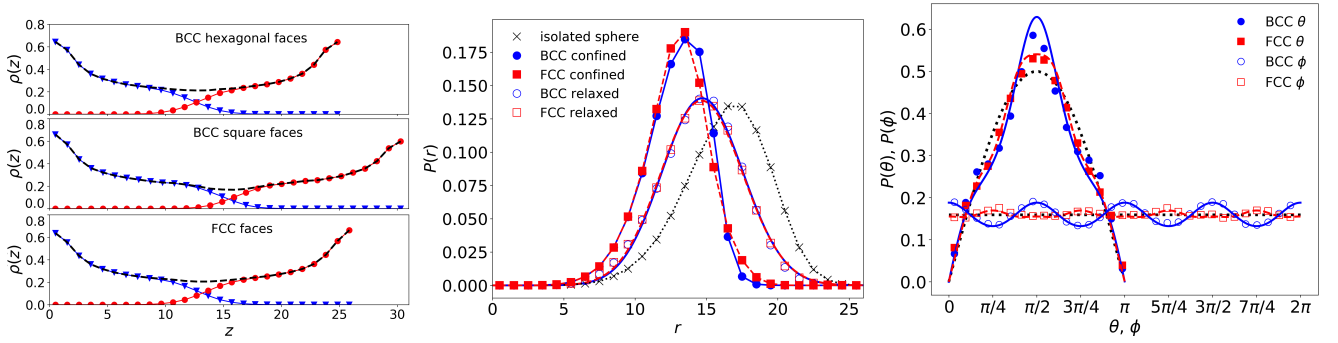

FIG. S2: Density profile  $\rho(z)$ , distribution  $P(r)$ ,  $P(\theta)$ ,  $P(\phi)$  for BCC and FCC structure at  $V = 34000$ . Symbol conventions are the same as the  $V = 18000$  figure in main text. Number of monomers per chain  $N_p = 40$ .

#### 5. DISTRIBUTION OF GRAFTED POLYMERS FOR $N_p = 60$ AT $V = 24000$ AND $V = 56000$

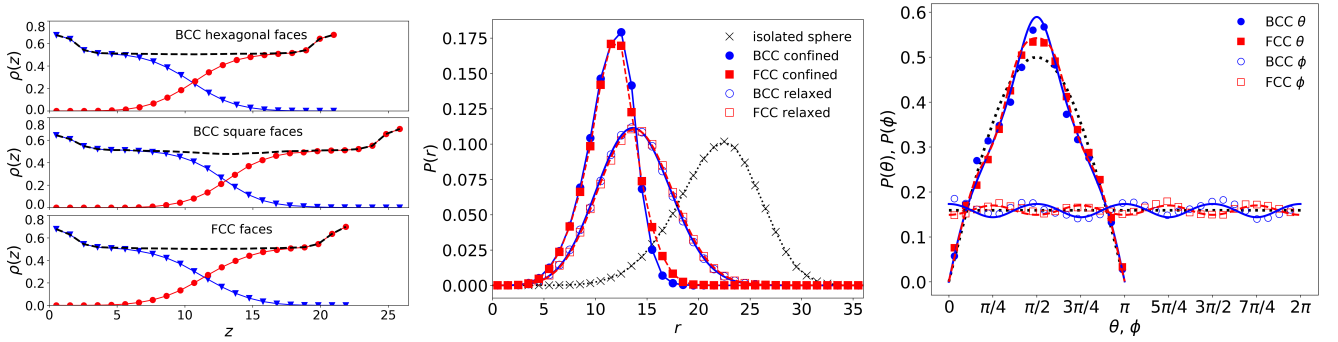

FIG. S3: Density profile  $\rho(z)$ , distribution  $P(r)$ ,  $P(\theta)$ ,  $P(\phi)$  for BCC and FCC structure at  $V = 24000$  and  $N_p = 60$ .

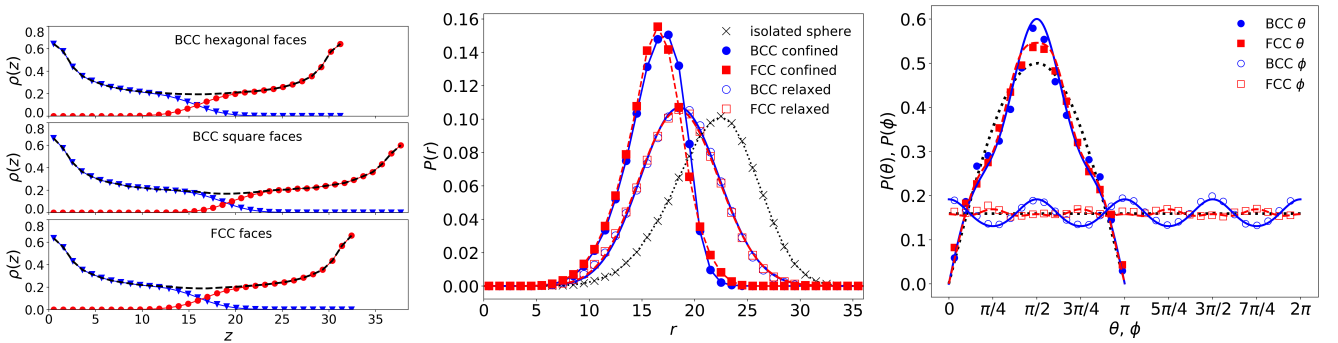

FIG. S4: Density profile  $\rho(z)$ , distribution  $P(r)$ ,  $P(\theta)$ ,  $P(\phi)$  for BCC and FCC structure at  $V = 56000$  and  $N_p = 60$ .

The corresponding entropy  $S$  of the distribution  $P(\mathbf{r})$  for  $N_p = 60$  systems is summarized in Table S8.

TABLE S8: Entropy  $S$  of the distribution  $P(\mathbf{r})$  and its radial and angular contributions at  $V = 24000$  and  $V = 56000$ . Grafted polymers are of  $N_p = 60$  and flexible with FENE bonds.

| $V$        | 24000  |        | 56000  |        |
|------------|--------|--------|--------|--------|
|            | BCC    | FCC    | BCC    | FCC    |
| $S_r$      | 7.860  | 7.892  | 8.541  | 8.547  |
| $S_\theta$ | 1.836  | 1.837  | 1.829  | 1.837  |
| $S_\phi$   | 0.688  | 0.690  | 0.685  | 0.689  |
| $S$        | 10.373 | 10.415 | 11.050 | 11.069 |

- 
- [1] S. Plimpton, Journal of Computational Physics **117**, 1 (1995).  
[2] D. Weaire and R. Phelan, Philosophical Magazine Letters **69**, 107 (1994).  
[3] R. Kusner and J. M. Sullivan, Forma **11**, 233 (1996).
